# Supplementary material for: Ten years of progress towards universal health coverage: has China achieved equitable healthcare financing?
Source: PubMed Central journal article supplement — BMJ Glob Health. 2020 Nov 18;5(11):e003570. doi: 10.1136/bmjgh-2020-003570 (PMC7677383; doi:10.1136/bmjgh-2020-003570), 2020-11-18
Supplement: bmjgh-2020-003570supp001.pdf [file bmjgh-2020-003570supp001.pdf]

## Supplementary material

**Supplemental Table 1A. Nine-grade income tax rates in 2008 in China**

| Grade | Taxable monthly salary * range (RMB) | Tax rate (%) | Deductible (RMB) |
|-------|--------------------------------------|--------------|------------------|
| 1     | 0–499                                | 5            | 0                |
| 2     | 500–1,999                            | 10           | 25               |
| 3     | 2,000–4,999                          | 15           | 125              |
| 4     | 5,000–19,999                         | 20           | 375              |
| 5     | 20,000–39,999                        | 25           | 1,375            |
| 6     | 40,000–59,999                        | 30           | 3,375            |
| 7     | 60,000–79,999                        | 35           | 6,375            |
| 8     | 80,000–99,999                        | 40           | 10,375           |
| 9     | 100,000+                             | 45           | 15,375           |

RMB, RenMinBi.

\*Taxable monthly salary refers to the difference between the total monthly salary and 1,600 RMB

**Supplemental Table 1B. Seven-grade income tax rates in 2013 and 2018 in China**

| Grade | Taxable monthly salary * range (RMB) | Tax rate (%) | Deductible (RMB) |
|-------|--------------------------------------|--------------|------------------|
| 1     | 0–1,499                              | 3            | 0                |
| 2     | 1,500–4,499                          | 10           | 105              |
| 3     | 4,500–8,999                          | 20           | 555              |
| 4     | 9,000–34,999                         | 25           | 1,005            |
| 5     | 35,000–54,999                        | 30           | 2,755            |
| 6     | 55,000–79,999                        | 35           | 5,505            |
| 7     | 80,000+                              | 45           | 13,505           |

RMB, RenMinBi.

\*Taxable monthly salary refers to the difference between the total monthly salary and 3,500 RMB
